# Supplementary material for: Hollow cobalt phosphonate spherical hybrid as high-efficiency Fenton catalyst
Source: Royal Society of Chemistry journal article supplement (doi:10.1039/c4nr02679a), 2014-01-01
Supplement: c4nr02679a1.pdf [file c4nr02679a1.pdf]

## Supplementary Information

# Hollow cobalt phosphonate spheres as promising alternative Fenton catalyst

*Yun-Pei Zhu,<sup>a</sup> Tie-Zhen Ren<sup>b</sup> and Zhong-Yong Yuan<sup>a\*</sup>*

*<sup>a</sup> Key Laboratory of Advanced Energy Materials Chemistry (Ministry of Education), Collaborative Innovation Center of Chemical Science and Engineering (Tianjin), College of Chemistry, Nankai University, Tianjin 300071, China. E-mail: [zyyuan@nankai.edu.cn](mailto:zyyuan@nankai.edu.cn).*

*<sup>b</sup> School of Chemical Engineering and Technology, Hebei University of Technology, Tianjin 300130, China.*

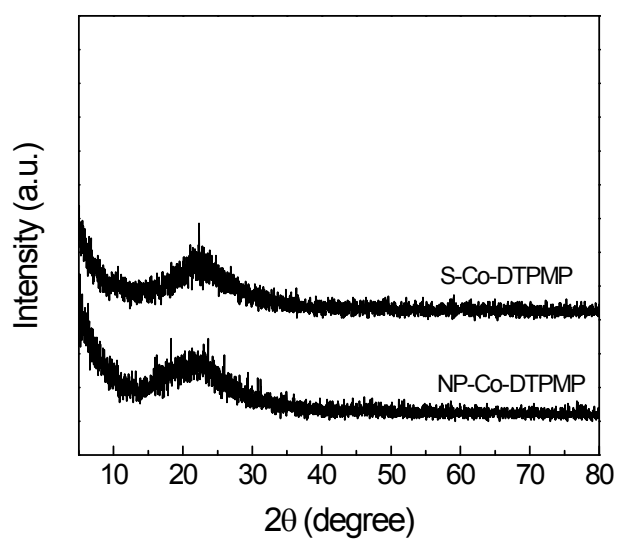

**Fig. S1** XRD pattern of the synthesized cobalt phosphonate hybrid materials.

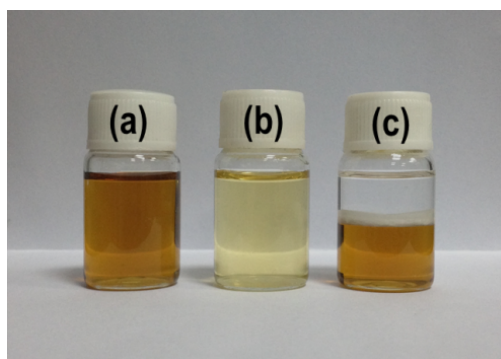

**Fig. S2** Digital photographs of DTPMP (a) and the corresponding 25 wt% aqueous solution (b), (c) shows the obvious stratification phenomenon after mixing DTPMP with ethanol.

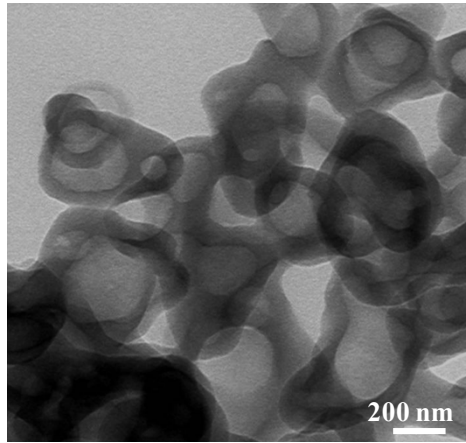

**Fig. S3** TEM image of the S-Co-DTPMP sample after three times cycling test.
